# Supplementary material for: Detection of Antimicrobial Resistance, Pathogenicity, and Virulence Potentials of Non-Typhoidal Salmonella Isolates at the Yaounde Abattoir Using Whole-Genome Sequencing Technique
Source: MDPI journal article supplement (doi:10.3390/pathogens11050502), 2022-04-23
Supplement: s1 [file s1]

**Table S1.** Summary of genome analysis of non-typhoidal *Salmonella* isolated from the Yaoundé abattoir, Cameroon

| GenBank<br>accession no. | No.<br>coding<br>genes | No.<br>RNA | No.<br>ncRNAs | No.<br>tRNAs | No.<br>CRISPR<br>arrays | No.<br>contigs | Total<br>length<br>(Mb) | GC%  | Subspecies      | Predicted<br>serotype | MLST    |
|--------------------------|------------------------|------------|---------------|--------------|-------------------------|----------------|-------------------------|------|-----------------|-----------------------|---------|
| PYKK00000000             | 5,336                  | 85         | 12            | 63           | 2                       | 211            | 4,611,182               | 52   | <i>enterica</i> | Poona                 | ST-308  |
| PYKJ00000000             | 4,799                  | 98         | 15            | 71           | 2                       | 50             | 4,762,368               | 52   | <i>enterica</i> | Enteritidis           | ST-11   |
| PYKI00000000             | 5,881                  | 89         | 13            | 63           | 3                       | 359            | 4,536,152               | 52   | <i>enterica</i> | Poona                 | ST-308  |
| PYKH00000000             | 4,630                  | 98         | 11            | 66           | 2                       | 138            | 4,769,090               | 52   | <i>enterica</i> | Wilhelmsburg          | ST-3311 |
| PYKG00000000             | 4,641                  | 105        | 12            | 73           | 2                       | 183            | 4,772,851               | 52   | <i>enterica</i> | Wilhelmsburg          | ST-3311 |
| PYKF00000000             | 4,886                  | 96         | 12            | 64           | 2                       | 84             | 4,785,147               | 52   | <i>enterica</i> | Wilhelmsburg          | ST-3311 |
| PYKE00000000             | 4,587                  | 83         | 12            | 63           | 3                       | 347            | 4,707,411               | 51   | <i>enterica</i> | Wernigerode           | ST-4585 |
| PYKD00000000             | 4,655                  | 105        | 14            | 72           | 2                       | 230            | 4,715,897               | 52   | <i>enterica</i> | Poona                 | ST-308  |
| PYKC00000000             | 4,608                  | 78         | 11            | 62           | 2                       | 173            | 4,746,203               | 52   | <i>enterica</i> | Wilhelmsburg          | ST-3311 |
| PYKB00000000             | 5,270                  | 68         | 9             | 48           | 2                       | 175            | 4,771,862               | 52   | <i>enterica</i> | Wilhelmsburg          | S-3311  |
| PYKA00000000             | 4,561                  | 84         | 13            | 63           | 2                       | 141            | 4,718,495               | 52   | <i>enterica</i> | Wilhelmsburg          | S-3311  |
| PYJZ00000000             | 4,624                  | 84         | 13            | 64           | 2                       | 142            | 4,756,935               | 51.4 | <i>enterica</i> | Wilhelmsburg          | S-3311  |
| PYJY00000000             | 4,775                  | 96         | 13            | 70           | 2                       | 332            | 4,818,121               | 52   | <i>enterica</i> | Enteritidis           | ST-11   |
| PYJX00000000             | 4,562                  | 99         | 14            | 66           | 2                       | 251            | 4,645,907               | 52   | <i>enterica</i> | Infantis              | ST-1823 |
| PYJW00000000             | 4,507                  | 99         | 15            | 64           | 3                       | 194            | 4,634,563               | 51   | <i>enterica</i> | Infantis              | ST-1824 |
| PYJV00000000             | 4,605                  | 83         | 13            | 64           | 2                       | 132            | 4,751,175               | 51   | <i>enterica</i> | Wernigerode           | ST-4585 |
| PYJU00000000             | 4,646                  | 107        | 12            | 71           | 2                       | 92             | 4,794,148               | 52   | <i>enterica</i> | Wernigerode           | ST-4584 |
| PYJT00000000             | 4,622                  | 88         | 14            | 66           | 2                       | 300            | 4,734,751               | 51   | <i>enterica</i> | Wilhelmsburg          | S-3311  |
| PYJR00000000             | 4,550                  | 82         | 12            | 62           | 2                       | 142            | 4,672,451               | 51.2 | <i>enterica</i> | Kibusi                | ST-4584 |

**Table S2.** Antimicrobial sensitivity of non-typhoidal *Salmonella* isolated at the Yaounde abattoir

| Sample code | <i>Salmonella</i> isolate | Tetracycline (Ø= mm) | Chloramphenicol (Ø= mm) | Streptomycin (Ø= mm) | Ampicillin (Ø= mm) |
|-------------|---------------------------|----------------------|-------------------------|----------------------|--------------------|
| 34ev        | Wernigerode               | 30                   | 34                      | 24                   | 22                 |
| 8ev         | Poona                     | 9 (≤ 11)             | 7 (≤ 12)                | 6 (≤ 11)             | 6 (≤ 13)           |
| 35dea       | Wilhelmsburg              | 28                   | 35                      | 25                   | 22                 |
| 35deb       | Wilhelmsburg              | 30                   | 31                      | 24                   | 20                 |
| 22sa        | Poona                     | 10 (≤ 11)            | 6 (≤ 12)                | 6 (≤ 11)             | 6 (≤ 13)           |
| 31eva       | Wilhelmsburg              | 33                   | 40                      | 25                   | 22                 |
| 31evb       | Wilhelmsburg              | 38                   | 46                      | 25                   | 20                 |
| 32eva       | Wilhelmsburg              | 35                   | 40                      | 25                   | 25                 |
| 32evb       | Wernigerode               | 30                   | 31                      | 25                   | 23                 |
| 86ev        | Infantis                  | 27                   | 35                      | 8                    | 14 (14-16)         |
| 100ev       | Wernigerode               | 32                   | 40                      | 24                   | 22                 |
| 36ev        | Wilhelmsburg              | 29                   | 38                      | 25                   | 22                 |
| 98se        | Wernigerode               | 32                   | 40                      | 26                   | 18                 |
| 108ev       | Kibusi                    | 30                   | 38                      | 25                   | 17                 |
| 20de        | Enteritidis               | 32                   | 35                      | 8 (≤ 11)             | 22                 |
| 34de        | Poona                     | 10 (≤ 11)            | 10 (≤ 12)               | 6 (≤ 11)             | 7 (≤ 13)           |
| 60sa        | Enteritidis               | 34                   | 35                      | 13 (12-14)           | 29                 |
| 88sa        | Infantis                  | 32                   | 40                      | 25                   | 24                 |
| 88sab       | Infantis                  | 33                   | 38                      | 24                   | 22                 |
| 133sa       | Enteritidis               | 32                   | 36                      | 25                   | 14 (14-16)         |
| 103bo       | Wilhelmsburg              | 34                   | 40                      | 24                   | 20                 |
| EVJUL       | Mbandaka                  | 28                   | 33                      | 9 (≤ 11)             | 18                 |
| DEF1        | Not sequenced             | 30                   | 36                      | 22                   | 20                 |

**NB:** Zone of inhibition in **red** indicates resistance to the test antibiotic; **blue** = intermediate; in black are the numbers representing the diameter of zone of inhibition mean susceptible to the test antibiotics; code and serovar of *Salmonella* strain written in **red**, represent the multidrug-resistant (MDR) strains.

**Table S3.** Function of each virulence factor (See ResFinder 1.0)

| Category | Function                                                                                                                                                                                                                                  |
|----------|-------------------------------------------------------------------------------------------------------------------------------------------------------------------------------------------------------------------------------------------|
| 1        | Iron uptake system, sit operon                                                                                                                                                                                                            |
| 2        | P4-like integrase ; located within a high-pathogenicity-island (HPI) region                                                                                                                                                               |
| 3        | Type VI secretion system effector                                                                                                                                                                                                         |
| 4        | Multi drug resistance (ampicillin, gentamicin, streptomycin, spectinomycin, sulfathiazole, tetracycline, and nalidixic acid)                                                                                                              |
| 5        | Type III secretion system, invasion into epithelial cells, apoptosis (InvA, OrgA, SptP, SipA, SipB, SipC, SipD, SopE, prgH)                                                                                                               |
| 6        | Phage 46 and the sefA-R chaperone-usher fimbrial operon                                                                                                                                                                                   |
| 7        | sopB, mppA, icdA, envF, msgA, envE, pagD, pagC                                                                                                                                                                                            |
| 8        | msgA, narP                                                                                                                                                                                                                                |
| 9        | Acetyl-coA dehydrolase (gacD)                                                                                                                                                                                                             |
| 10       | LysR family transcriptional regulation (gtrB)                                                                                                                                                                                             |
| 11       | Transcriptional regulation (gtrA)                                                                                                                                                                                                         |
| 12       | Electron transfer favoprotein beta subunit (gpiA)                                                                                                                                                                                         |
| 13       | Transcriptional regulation (gpiB)                                                                                                                                                                                                         |
| 14       | Type III secretion system, required for systemic infection and intracellular pathogenesis by facilitating replication of intracellular bacteria within membrane-bound <i>Salmonella</i> -containing vacuoles                              |
| 15       | Invasion, survival in monocytes, Mg <sup>2+</sup> uptake (MgtC, B, MarT, MisL)                                                                                                                                                            |
| 16       | Invasion, survival in monocytes, Mg <sup>2+</sup> uptake (sugR, rhuMMgtC, B, MarT, MisL), putative fimbrial-like protein(yadC/K./L/M), probable pilin chaperone(ecpD1/D2)                                                                 |
| 17       | Type I secretion system, putative toxin secretion, apoptosis, required for intracellular survival in macrophages; large secretion protein(siiE) and Type I secretion system components(siiC,D,F), genes weakly similar to RTX-like toxins |
| 18       | Effector proteins for SPI-1 and SPI-2 (SopB, SigD, PipB)                                                                                                                                                                                  |
| 19       | safA-D and tcsA-R chaperone-usher fimbrialoperons6                                                                                                                                                                                        |
| 20       | Vi exopolysaccharide, SopE prophage and a type IVB pilus operon                                                                                                                                                                           |
| 21       | Two bacteriocin pseudogenes, genes conferring immunity to the bacteriocins                                                                                                                                                                |
| 22       | Type I secretory apparatus, large RTX-like protein                                                                                                                                                                                        |
| 23       | Intestinal colonization and persistence determinants (shdA, ratA, ratB, sivI, sivH)                                                                                                                                                       |

**Table S4.** *Salmonella* pathogenicity island-encoded effector proteins

| Isolates                                                                                                            | Protein effector                                                                                                                                                                                                                                              | Function                                                                                                                                                                                                                                                           | Origin                                                                                                                                                                                                                        |
|---------------------------------------------------------------------------------------------------------------------|---------------------------------------------------------------------------------------------------------------------------------------------------------------------------------------------------------------------------------------------------------------|--------------------------------------------------------------------------------------------------------------------------------------------------------------------------------------------------------------------------------------------------------------------|-------------------------------------------------------------------------------------------------------------------------------------------------------------------------------------------------------------------------------|
| 8ev, 20de, 31eva, 31evb, 32eva, 32evb, 34de, 34ev, 35dea, 35deb, 36ev, 60sa, 88sa, 88sab, 98se, 100ev, 103bo, 108ev | Cell adherence/invasion proteins : SipA, EnvF, InvA, InvE, SipB, SipC, SipD, SopB, SopE, Sii E, IagB, SptP, protein oxygen-regulated invasion protein OrgB, PhoP, PhoH protein, protein MisL, host colonization factor (ShdA), protein rtn T 6SS protein IcmF | involved in adherence, cell aggregation, biofilm formation, cell invasion, resistance to antimicrobial peptides, internalization and survival within macrophages                                                                                                   | <i>S. Enteritidis</i> P125109, <i>S. Paratyphi A</i> ATCC 9150, <i>S. Newport</i> SL254, <i>S. Agona</i> SL483, <i>S. Typhimurium</i> LT2, <i>S. Schwarzengrund</i> <i>S. Choleraesuis</i> SC-B67, <i>S. Heidelberg</i> SL476 |
| 31eva, 31evb, 32eva, 34de, 34ev, 36ev, 88sab, 98se, 100ev, 103bo                                                    | OmpL                                                                                                                                                                                                                                                          | Outer membrane protein with high immunogenicity potential                                                                                                                                                                                                          | <i>S. Schwarzengrund</i> , <i>S. Newport</i> SL254                                                                                                                                                                            |
| 20de, 22sa, 31evb, 32evb, 36ev, 60sa, 88sab                                                                         | Heat shock protein, Stress proteins                                                                                                                                                                                                                           | Small polypeptides that play important role during <i>Salmonella</i> pathogenesis                                                                                                                                                                                  | <i>S. Choleraesuis</i> SC-B67, <i>Klebsiella pneumoniae</i>                                                                                                                                                                   |
| 8ev, 20de, 31eva, 31evb, 32eva, 34de, 34ev, 35dea, 36ev, 60sa, 88sa, 88sab, 98se, 100ev, 103bo, 108ev               | T3SS effector protein SopA, SopE, secreted effector protein SopE2, virulence proteins SopD and SopD2, Effector proteins pipB2, SpiC, SpvB, SseB, SseC, and SseD, T6SS lysozyme-related protein, Ais protein, effector proteins IpaD/SipD, protein bax         | Promote <i>Salmonella</i> survival replication within macrophages, critical for virulence in different hosts, in invasion of epithelial cells and intestinal inflammation, translocation of SPI-1, SPI2 effector proteins<br><br>Involved in proapoptotic activity | <i>S. Enteritidis</i> P125109, <i>S. Paratyphi A</i> ATCC 9150, <i>S. Newport</i> SL254, <i>S. Paratyphi C</i> RKS4594 <i>S. Schwarzengrund</i> , <i>S. Agona</i> SL483 <i>S. Heidelberg</i> SL476                            |
| 20de, 31eva, 31evb, 32eva, 34de, 34ev, 36ev, 60sa, 88sa, 88sab, 98se, 100ev, 108ev                                  | Antigen presentation protein SpaK, SpaN, SpaS, SpaR,                                                                                                                                                                                                          | Responsible for the surface presentation of determinants needed for the entry of <i>Salmonella</i> species into host cells                                                                                                                                         | <i>S. Agona</i> SL483, <i>Typhimurium</i> LT2, <i>S. Newport</i> SL254r. SL483                                                                                                                                                |
| 8ev, 20de, 31eva, 31evb, 32eva, 32evb, 34de, 34ev, 36ev, 60sa, 88sa, 88sab, 98se, 103bo, 108ev                      | EsrB, secretion system apparatus SsaV, SsaH and SsaM, SPI-6 encoded Rhs- protein                                                                                                                                                                              | Response regulators of secreted effectors and host inflammatory responses                                                                                                                                                                                          | <i>S. Schwarzengrund</i> CVM19633, <i>S. Newport</i> SL254                                                                                                                                                                    |

**Table S5a.** Distribution of adhesion factors, toxins and virulence plasmids

| Isolate                                                                                           | Virulence determinant                             | Function                                                                  | Origin                                                                      |
|---------------------------------------------------------------------------------------------------|---------------------------------------------------|---------------------------------------------------------------------------|-----------------------------------------------------------------------------|
| 8ev,20de, 31eva, 31evb, 32eva, 34de, 34ev,35dea,36ev,60sa,88sab,98se, 100ev, 103bo,108ev          | Transcriptional regulator CsgD                    | Master transcriptional regulator in biofilm formation                     | S. Schwarzengrund CVM19633                                                  |
| 20de, 31eva, 31evb, 32eva, 34de, 34ev,35dea, 36ev, 60sa, 88sa, 88sab, 98se, 100ev, 103bo, 108ev   | Flagellin: Protein FlhZ, FlhT                     | Class 2 flagellar genes acting as repressor genes                         | S. Paratyphi A ATCC 9150, S. Newport SL254                                  |
| 20de,31eva,31evb,32eva,34de,34ev, 36ev,60sa,88sa,88sab,98se,100ev, 103bo,108ev                    | Pilin chaperon ecpD1                              | encoded on SPI-3 and expressed with increasing temperature above 22°C     | S. Choleraesuis SC-B67, S. Agona SL483                                      |
| 8ev, 20de, 31evb, 32eva, 34de,60sa,88sa,88sab, 108ev                                              | Putative entericidin A                            | Bacterial antidote/toxin peptides for maintain plasmids stability         | S. Typhimurium. LT2, S. Paratyphi C RKS4594                                 |
| 20de, 31evb,32eva, 34ev, 36ev, 88sa, 88sab, 98se, 100ev, 108ev                                    | Flavodoxin                                        | Small soluble electron transfer protein acting as bactericidal molecules  | S. Schwarzengrund                                                           |
| 20de,22sa,31eva, 31evb,35dea,32eva,34de, 34ev, 36ev, 60sa, 88sa, 88sab, 98se, 100ev, 103bo, 108ev | Thioredoxin 1 (TrxA)                              | Protects <i>Salmonella</i> against the oxidative stress                   | <i>Escherichia coli</i> 536                                                 |
| 8ev, 31eva, 31evb, 32eva, 32evb, 34ev, 35dea, 36ev, 88sa, 88sab, 98se, 100ev, 103bo               | Putative fimbriae; usher: FimA, FimC, FimZ, HilD, | Play key role in adhesion of <i>Salmonella</i> to the host cell receptors | S. Heidelberg SL476, S. Enteritidis P125109. Agona. SL483, S. Newport SL254 |
| 22sa, 31eva, 31evb, 32evb, 35dea, 36ev, 103bo                                                     | Transposase for element IS200                     | Transposons playing key role in host gene expression control              | S. Paratyphi A ATCC 9150                                                    |
| 20de, 60sa,88sab, 98se, 100ev                                                                     | Putative ABC-type bacteriocin exporter            | Export of bacteriocin and autoprotection                                  | S. Newport str. SL254<br>S. Typhimurium LT2                                 |
| 60sa, 100ev                                                                                       | Putative shiga-like toxin A subunit               | E. coli derived toxin                                                     | <i>E. coli</i> 536                                                          |

**Table S5b.** Distribution of adhesion factors, and virulence plasmid (continued)

| Isolates                                                                                             | Virulence determinant                                                  | Function                                                                                                                                          | Origin                                                                      |
|------------------------------------------------------------------------------------------------------|------------------------------------------------------------------------|---------------------------------------------------------------------------------------------------------------------------------------------------|-----------------------------------------------------------------------------|
| 8ev, 22sa, 34de                                                                                      | Col (PHAD28) plasmid                                                   | Harbor gene <i>qnrB</i> encoding resistance against fluoroquinolone                                                                               | <i>S. Hadar</i> HAD28                                                       |
| 8ev, 20de, 34de, 60sa                                                                                | IncFII (S) and IncI1-1 ( $\alpha$ ) plasmids                           | Harbor toxin SpvB and mediate resistance against aminoglycosides, tetracycline, chloramphenicol, sulfonamides, $\beta$ -lactams, fluoroquinolones | <i>S. Paratyphi</i> C<br>RKS4594<br><i>S. Typhimurium</i>                   |
| 34de                                                                                                 | IncH12 and IncH12A plasmids                                            | Mediate resistance to aminoglycosides, tetracycline, chloramphenicol, sulfonamides, $\beta$ -lactams, fluoroquinolones                            | <i>Serratia mrescens</i><br>K478                                            |
| 8ev, 20de, 34de 31eva, 32eva, 32evb, 35dea, 36ev, 88sab, 98se, 100ev                                 | Proteins CuSA & ScsC                                                   | Regulate the intracellular excess of copper and promotes intramacrophage survival                                                                 | <i>S. Agona</i> SL483, <i>S. Typhimurium</i> LT2<br><i>S. Newport</i> SL254 |
| 8ev, 20de, 31eva, 31evb, 32evb, 34de, 34ev, 35dea, 36ev, 60sa, 88sa, 98se, 100ev, 103bo, 108ev 88sab | Putative Lys R family                                                  | Regulates many cellular processes (activators and repressors, N-terminal DNA binding domain)                                                      | <i>S. Paratyphi</i> A<br>ATCC9150, <i>S. Typhimurium</i> LT2                |
| 34de, 60sa, 88sa, 88sab, 98se, 100ev                                                                 | Virulence genes <i>ter C</i> , <i>tehA</i> , <i>Terx</i> , <i>Terw</i> | Plasmid-borne genes coding for tellerium ion protein resistance                                                                                   | <i>E. coli</i> plasmid<br>pJIE186-2                                         |
| 34de                                                                                                 | <i>cvaC</i> and <i>mchF</i> genes                                      | Microcin V genes for the synthesis of microcin                                                                                                    | <i>E. coli</i><br>plasmid <sup>PCOLVCA7V</sup>                              |
